# Supplementary material for: Two-dimensional Janus SeMoZAZ′ (A = Si, Ge; Z = N, P, As; Z ≠ Z′): multifunctional properties for electronic, piezoelectric and photocatalytic applications
Source: Royal Society of Chemistry journal article supplement (doi:10.1039/d4nj02366h), 2024-01-01
Supplement: d4nj02366h1.pdf [file d4nj02366h1.pdf]

## Supporting Information

### **Two-Dimensional Janus SeMoZAZ' (A=Si, Ge; Z= N, P, As; Z≠Z'): Multifunctional Properties for Electronics, Piezoelectric and Photocatalytic**

Zhen Gao<sup>a</sup>, Hongbo Wu<sup>b</sup>, YaoHe<sup>a,\*</sup>, and Kai Xiong<sup>c,\*</sup>

<sup>a</sup>*Department of Physics, Yunnan University, Kunming 650091, People's Republic of China.*

<sup>b</sup>*School of Science, Yangzhou Polytechnic Institute, Yangzhou 225127, China.*

<sup>c</sup>*Materials Genome Institute, School of Materials and Energy, Yunnan University, Kunming 650091, P. R. China.*

\*E-mail:

[yhe@ynu.edu.cn](mailto:yhe@ynu.edu.cn); [xionгкаi@ynu.edu.cn](mailto:xionгкаi@ynu.edu.cn)

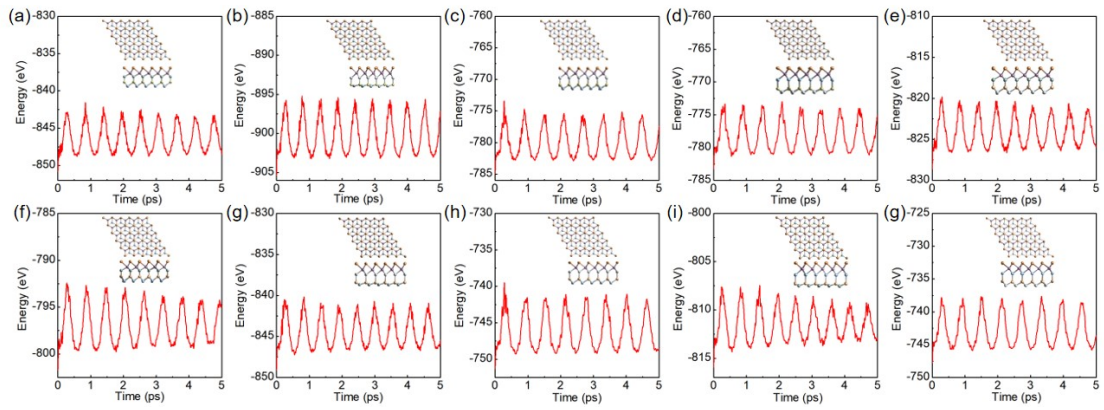

Fig S1 Variation of the energy as a function of time for the Janus (a) SeMoNSiAs, (b) SeMoPSiN, (c) SeMoPSiAs, (d) SeMoAsSiP, (e) SeMoNGeP, (f) SeMoNGeAs, (g) SeMoPGeN, (h) SeMoPGeAs, (i) SeMoAsGeN, and (j) SeMoAsGeP monolayers at 300K. The insets are the top and side views of the structure at the end of the AIMD simulation.

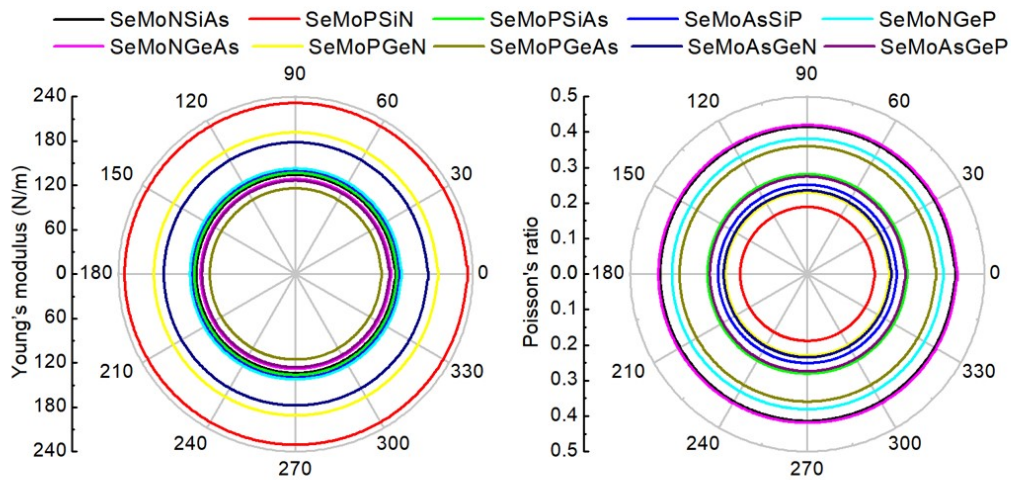

Fig S2 Young's modulus  $Y_{2D}$  and Poisson ratio  $\nu$  of SeMoZAZ' (A=Si,Ge; Z,Z'=N, P, As; Z $\neq$ Z') monolayers.

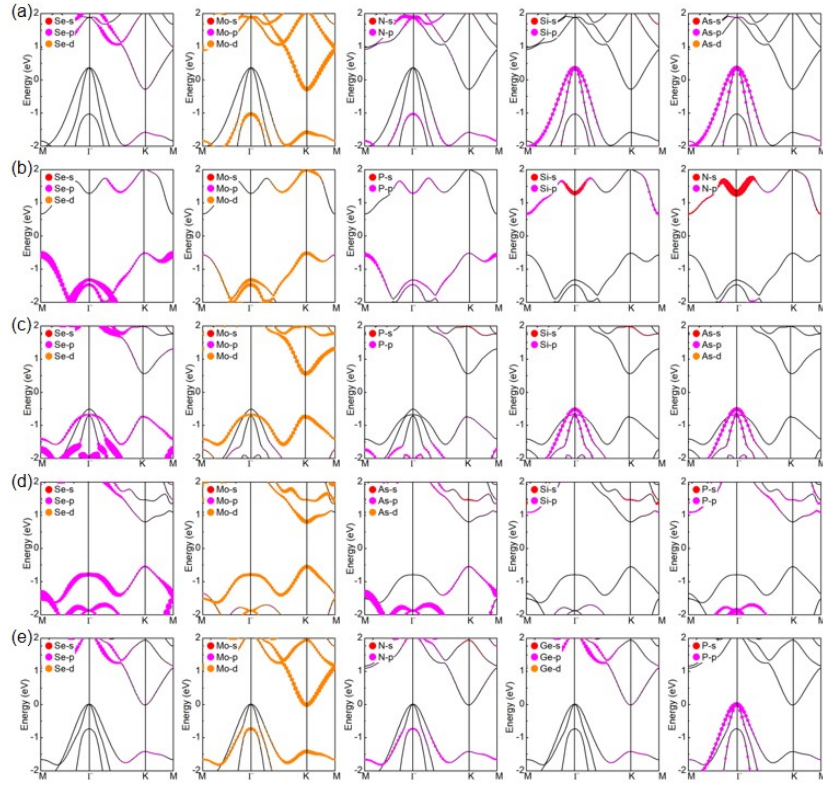

Fig S3 Projected band structure of 2D Janus (a) SeMoNSiAs, (b) SeMoPSiN, (c) SeMoPSiAs, (d) SeMoAsSiP, and (e) SeMoNGeP monolayers at equilibrium.

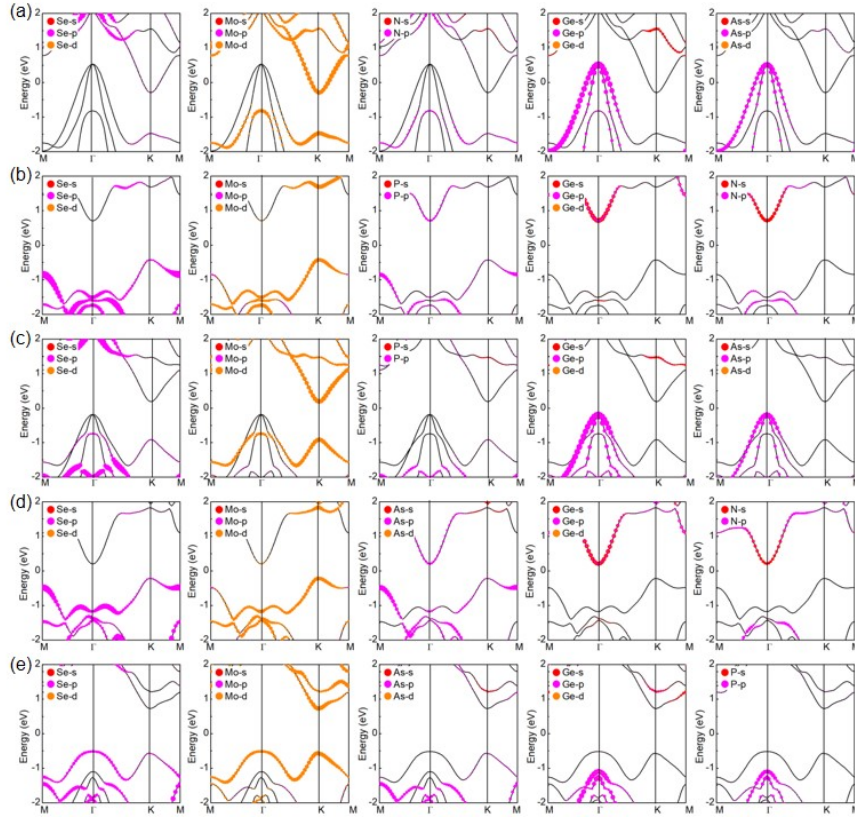

Fig S4 Projected band structure of 2D Janus (a) SeMoNGeAs, (b) SeMoPGeN, (c) SeMoPGeAs, (d) SeMoAsGeN, and (e) SeMoAsGeP monolayers at equilibrium.

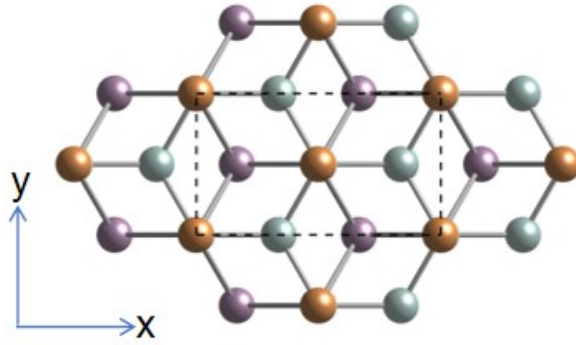

Fig S5 The calculation of piezoelectric stress coefficients and carrier mobility is carried out in rectangular cell in the black dotted box, the x and y directions also been indicate.

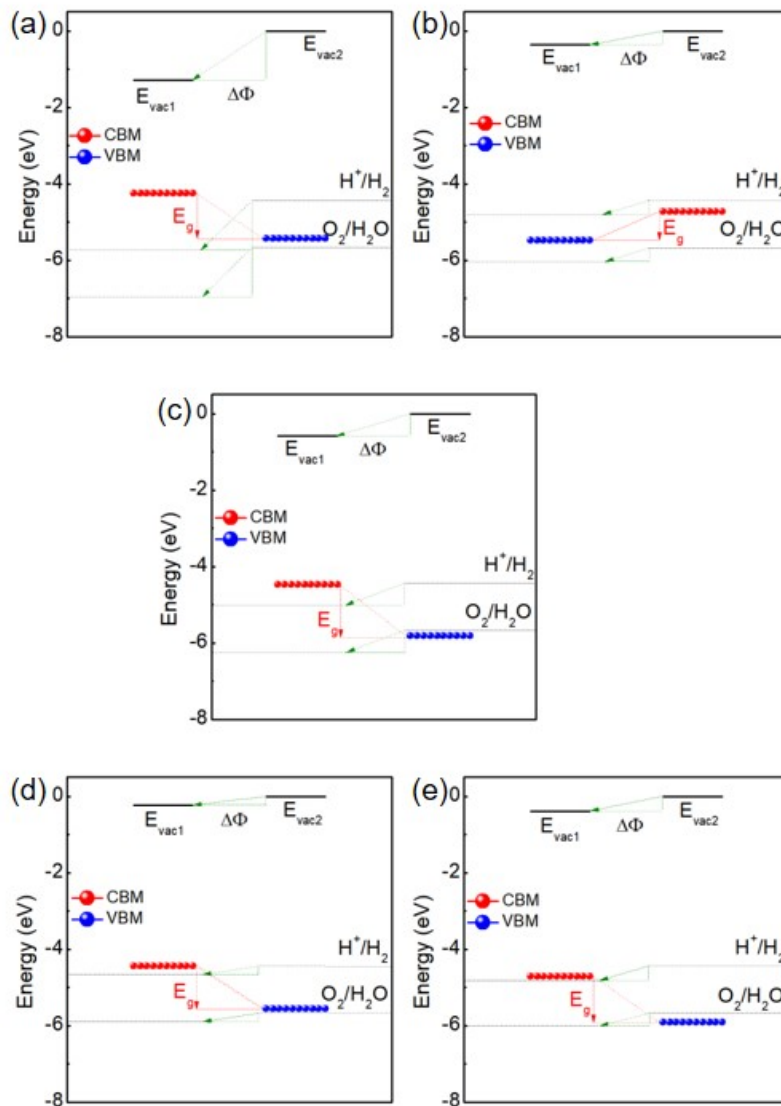

Fig S6 Band alignments with regard to the vacuum level of pristine (a) SeMoPSiN, (b) SeMoPSiAs (c)SeMoAsSiP, (d) SeMoPGeN and (e)SeMoAsGeP under the HSE06 functional.

## The Solar-to-hydrogen (STH) Efficiency

The STH efficiency is evaluated using the methods proposed by Yang et al.<sup>1</sup> According to the reaction process, STH efficiency is defined as the product of the efficiency of light absorption ( $\eta_{abs}$ ) and carrier utilization ( $\eta_{cu}$ ).

$$\eta_{STH} = \eta_{abs} \times \eta_{cu} \quad (1)$$

The efficiency of light absorption is defined as:

$$\eta_{abs} = \frac{\int_{E_g}^{\infty} P(h\omega) d(h\omega)}{\int_0^{\infty} P(h\omega) d(h\omega)} \quad (2)$$

where  $P(h\omega)$  are the AM1.5G solar energy flux at the photon energy  $h\omega$  and  $E_g$  is the band gap of the materials. The denominator represents the total power density of the reference sunlight spectrum (AM1.5G) and the numerator gives the light power density absorbed by the photocatalyst.

The efficiency of carrier utilization ( $\eta_{cu}$ ) is defined as:

$$\eta_{cu} = \frac{\Delta G_{H_2O} \int_E^{\infty} \frac{P(h\omega)}{h\omega} d(h\omega)}{\int_{E_g}^{\infty} P(h\omega) d(h\omega)} \quad (3)$$

where  $\Delta G_{H_2O}$  is the free energy of water splitting (1.23eV) and the rest of numerator represents the effective photocurrent density. Here, E represents the photon energy that can be actually utilized in the process of water splitting.

$$E = \begin{cases} E_g, & (\chi(H_2) \geq 0.2, \chi(O_2) \geq 0.6) \\ E_g + 0.2 - \chi(H_2), & (\chi(H_2) < 0.2, \chi(O_2) \geq 0.6) \\ E_g + 0.6 - \chi(O_2), & (\chi(H_2) \geq 0.2, \chi(O_2) < 0.6) \\ E_g + 0.8 - \chi(H_2) - \chi(O_2), & (\chi(H_2) < 0.2, \chi(O_2) < 0.6) \end{cases} \quad (4)$$

The intrinsic electric field does positive work for the electron-hole separation during the process of photocatalytic water splitting. Therefore, this part of work should be added into the total energy, and then the corrected STH efficiency of photocatalytic water splitting for 2D material with vertical intrinsic EF is calculated as:

$$\eta_{STH}' = \eta_{STH} \times \frac{\int_0^{\infty} P(h\omega) d(h\omega)}{\int_0^{\infty} P(h\omega) d(h\omega) + \Delta V \int_{E_g}^{\infty} \frac{P(h\omega)}{h\omega} d(h\omega)} \quad (5)$$

where  $\Delta V$  is the vacuum level difference on the two respective surfaces.

1. C.-F. Fu, J. Sun, Q. Luo, X. Li, W. Hu and J. Yang, *Nano Lett.*, 2018, **18**, 6312-6317.
